# Supplementary material for: Formulations of the closed-shell interactions in endohedral systems
Source: Royal Society of Chemistry journal article supplement (doi:10.1039/b922808j), 2010-01-01
Supplement: b922808j.pdf [file b922808j.pdf]

# Supporting information for 'Formulations of the closed-shell interactions in endohedral systems'

Cong Wang<sup>a</sup>, Michal Straka<sup>b</sup>, and Pekka Pyykkö<sup>a\*</sup>

<sup>a</sup>Department of Chemistry, University of Helsinki,  
POB 55 (A. I. Virtasen aukio 1), 00014 Helsinki, Finland.

E-mail: Pekka.Pyykko@helsinki.fi

<sup>b</sup> Institute of Organic Chemistry and Biochemistry,  
Academy of Sciences of the Czech Republic,  
Flemingovo nám. 2, 16610 Prague, Czech Republic.

April 13, 2010

## 1 Derivations for the quasi-spherical and nanotube irregular polarizabilities, eqns (97-98)

We start the derivation of eqns (97-98) from a London-like formula for the dipole-dipole dispersion interaction between two  $C_{2v}$  monomers using the expression [1]

$$\Delta E_{\text{disp,DD}}^{(2)} \approx -\frac{1}{4} \frac{I_A I_B}{I_A + I_B} \frac{\alpha_{XX}^A \alpha_{XX}^B + \alpha_{YY}^A \alpha_{YY}^B + 4\alpha_{ZZ}^A \alpha_{ZZ}^B}{R^6}. \quad (1)$$

Here  $I_A$  and  $I_B$  are the ionization potentials of monomers  $A$  and  $B$  respectively. The  $\alpha_{XX}$ ,  $\alpha_{YY}$  and  $\alpha_{ZZ}$  are the principal-axis components of the polarizability tensors of the monomers, assumed to be parallel with the intermolecular coordinate system ( $XYZ$ ). Note that the contribution from the intermolecular axis  $Z$  is four times larger than the two contributions perpendicular to  $Z$ . The  $R$  is the intermolecular distance.

Consider first a spherical shell with a polarizability density  $\rho_{ii} = d\alpha_{ii}/ds$ ,  $ds$  being a surface element on the surface  $S$ . From eqn (1), assuming  $\alpha_{XX}^A = \alpha_{YY}^A \equiv \alpha_{\perp}^A$  and  $\alpha_{ZZ}^A \equiv \alpha_{\parallel}^A$ , we obtain

$$\Delta E = -\frac{1}{4} \frac{I_A I_B}{I_A + I_B} \int_S [2\alpha_{\perp}^A \rho_{\perp}^B + 4\alpha_{\parallel}^A \rho_{\parallel}^B] R^{-6} ds. \quad (2)$$

For an isotropic case,  $\alpha_{\perp}^A = \alpha_{\parallel}^A = \alpha^A$ ,  $\rho_{\perp}^B = \rho_{\parallel}^B = \rho^B$ , giving

$$\Delta E = -6\pi \frac{I_A I_B}{I_A + I_B} \alpha^A \rho^B R^{-4}. \quad (3)$$

A comparison with eqn (69) of the main paper gives for a sphere

$$\bar{\alpha}_1^{\dagger B} = 8\pi \rho^B R^{-4}. \quad (4)$$

For an isotropic A on the axis,  $z$ , of a nanotube B we similarly get

$$\Delta E = -\frac{1}{4} \frac{I_A I_B}{I_A + I_B} 6\alpha^A \rho^B (2\pi R) \int_{-\infty}^{\infty} \frac{dz}{r^6} = -6\pi R \alpha^A \rho^B \frac{I_A I_B}{I_A + I_B} \int_0^{\infty} \frac{dz}{(R^2 + z^2)^3}, \quad (5)$$

where  $R$  is the radius of the tube, and  $r$  the distance from A to the surface element. Using eqn (3.249.1) of Ryzhik and Gradshteyn [2],

$$\Delta E = -\frac{9}{8} \pi^2 \rho \alpha^A \frac{I_A I_B}{I_A + I_B} R^{-4}, \quad (6)$$

yielding for the thin-walled cylinder

$$\bar{\alpha}_1^{\dagger B} = \frac{3}{2} \pi^2 \rho^B R^{-4}. \quad (7)$$

The sphere/tube ratio for the same  $R$  becomes  $16/3\pi$ . We repeat that this line of thought would only be valid if the contributions to eqn(1) could be independently integrated, which for the fullerenes is a bad approximation.

## 2 Explicit figures for the He<sub>2</sub>, He<sub>3</sub>, and A...C<sub>6</sub>H<sub>6</sub> model systems

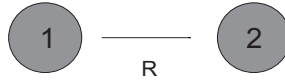

Figure 1: The geometry of the He<sub>2</sub> system.

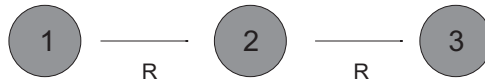

Figure 2: The geometry of the He<sub>3</sub> system.

### Additional references

- [1] J. Muñiz, C. Wang, and P. Pyykkö, unpublished manuscript.
- [2] I. S. Gradshteyn and I. M. Ryzhik, Tables of Integrals, Sums, Series and Products (in Russian), Fizmatgiz, Moscow, 1963, p. 308.

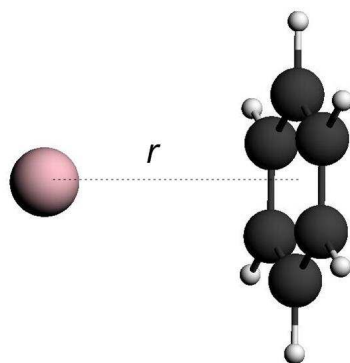

Figure 3: The geometry for the  $A \cdots C_6H_6$  model system.  $r$  was taken as  $4.0 \text{ \AA}$ .
